# Supplementary material for: Pharmacologic LDH inhibition redirects intratumoral glucose uptake and improves antitumor immunity in solid tumor models
Source: JCI journal article supplement (doi:10.1172/jci177606), 2024-09-02
Supplement: sd1 [file 1]

## Supplemental Material

**Full conflict-of-interest statement:** RZ is an inventor on the following patents and patent applications: “Treatment Of Glycolysis-Low And Glycolysis-High Tumors With CTLA-4 Inhibitors” (US provisional application 63/310,089); “CD4+ TFH-Like Cells as a Therapeutic Target (international application PCT/US2021/055992); “Inhibition of CTLA-4 and/or PD-1 for Regulation of T cells” (US provisional patent 62/582,416); “Antibodies and Methods of Use Thereof” (US provisional patent application WO2018106864A1); “Anti-PD-1 Antibodies and Methods of Use Thereof” (US patent application US10323091B2); and “Anti-GITR Antibodies and Methods of Use Thereof” (patent application US20180244793A1). RZ is a scientific advisory board member of iTEOS Therapeutics and receives grant support from AstraZeneca and Bristol Myers Squibb. JDW is a consultant for Apricity; Ascentage Pharma; AstraZeneca; BeiGene; Bicara Therapeutics; Bristol Myers Squibb; Chugai, Daiichi Sankyo; Dragonfly; Imvaq; Larkspur; Psioxus, Recepta; Tizona; Trishula Therapeutics; and Sellas. JDW received grant/research support from Bristol Myers Squibb. JDW has equity in Apricity, Arsenal IO; Ascentage; CellCarta; Imvaq; Linneaus, Larkspur; Georgiamune; Maverick; Tizona Therapeutics; and Xenimmune. JDW is an inventor on the following patents: “Xenogeneic DNA Vaccines,” “Newcastle Disease Viruses for Cancer Therapy,” “Myeloid-Derived Suppressor Cell (MDSC) Assay,” “Prediction Of Responsiveness to Treatment With Immunomodulatory Therapeutics and Method of Monitoring Abscopal Effects During Such Treatment,” “Anti-PD1 Antibody”; “Anti-CTLA4 Antibodies,” and “Anti-GITR Antibodies and Methods of Use Thereof”. TM is a consultant for Immunos Therapeutics, Daiichi Sankyo Co., TigeRx, Normunity, and Pfizer; is a cofounder of and equity holder in IMVAQ Therapeutics; receives research funding from Bristol Myers Squibb, Surface Oncology, Kyn Therapeutics, Infinity Pharmaceuticals, Peregrine Pharmaceuticals, Adaptive Biotechnologies, Leap Therapeutics, and Aprea Therapeutics; and is a named inventor on patents listed in the table below.

## Taha Merghoub Patents

<https://patents.google.com/?inventor=Taha+Merghoub&oq=Taha+Merghoub+>

| <b>Title:</b>                                                                                                                                                         | <b>Application number:</b> | <b>Filing Entity:</b>                  |
|-----------------------------------------------------------------------------------------------------------------------------------------------------------------------|----------------------------|----------------------------------------|
| Antibodies and methods of use thereof                                                                                                                                 | US11447557B2               | Agenus Inc.                            |
| Replication competent attenuated vaccinia viruses with deletion of thymidine kinase with and without the expression of human Flt3L or GM-CSF for cancer immunotherapy | US11986503B2               | Memorial Sloan Kettering Cancer Center |
| Anti-CTLA-4 antibodies and methods of use thereof                                                                                                                     | US11267889B2               | Agenus Inc.                            |
| Methods of administering anti-OX40 antibodies                                                                                                                         | US11472883B2               | Agenus Inc.                            |
| Anti-CTLA-4 antibodies and methods of use thereof                                                                                                                     | US11638755B2               | Agenus Inc.                            |
| Anti-OX40 antibodies and anti-GITR antibodies                                                                                                                         | US11359028B2               | Agenus Inc.                            |
| Anti-OX40 antibodies and methods of use thereof                                                                                                                       | US20210324097A1            | Agenus Inc.                            |

|                                                                                                                                                                       |                 |                                         |
|-----------------------------------------------------------------------------------------------------------------------------------------------------------------------|-----------------|-----------------------------------------|
| Anti-pd-1 antibodies and methods of use thereof                                                                                                                       | US20220372149A1 | Agenus Inc.                             |
| Recombinant MVA or MVA $\Delta$ EE3L expressing human FLT3L and use thereof as immuno-therapeutic agents against solid tumors                                         | US12036279B2    | Memorial Sloan Kettering Cancer Center  |
| Neoantigens and uses thereof for treating cancer                                                                                                                      | EP3576781B1     | Icahn School of Medicine at Mount Sinai |
| Use of inactivated nonreplicating modified vaccinia virus Ankara (MVA) as monoimmunotherapy or in combination with immune checkpoint blocking agents for solid tumors | US11426460B2    | Memorial Sloan Kettering Cancer Center  |
| Antibodies and method of use thereof                                                                                                                                  | US20200024350A1 | Agenus Inc.                             |
| Use of MVA or MVA $\Delta$ E3L as immunotherapeutic agents against solid tumors                                                                                       | US11253560B2    | Memorial Sloan Kettering Cancer Center  |
| Anti-GITR antibodies and methods of use thereof                                                                                                                       | AU2022215304A1  | Agenus Inc.                             |
| Anti-GITR antibodies and methods of use thereof                                                                                                                       | US20200123265A1 | Agenus Inc.                             |
| Methods and compositions for tumor therapy                                                                                                                            | AU2016304597B2  | Memorial Sloan Kettering Cancer Center  |
| Anti-OX40 antibodies and method of use thereof                                                                                                                        | EP3383914A1     | Agenus Inc.                             |

|                                                                                                      |                 |                                        |
|------------------------------------------------------------------------------------------------------|-----------------|----------------------------------------|
| Anti-GITR antibodies and methods of use thereof                                                      | WO2017096276A1  | Agenus Inc.                            |
| Recombinant poxviruses for cancer immunotherapy                                                      | US20220056475A1 | Memorial Sloan Kettering Cancer Center |
| BI-Specific activators for tumor therapy                                                             | US20240239910A1 | Memorial Sloan Kettering Cancer Center |
| Alphavirus Replicon Particles Expressing TRP2                                                        | US20200113984A1 | Alphavax, Inc.                         |
| Oncolytic Vaccinia virus expressing immune checkpoint blockade for cancer Immunotherapy              | EP3765047A1     | Memorial Sloan Kettering Cancer Center |
| Inducing favorable effects of tumor microenvironment via administration of nanoparticle compositions | EP3765047A1     | Memorial Sloan Kettering Cancer Center |
| Vaccinia Virus mutants useful for cancer immunotherapy                                               | US11884939B2    | Memorial Sloan Kettering Cancer Center |
| Methods and compositions for treatment of pancreatic cancer                                          | IL289251A       | Memorial Sloan Kettering Cancer Center |
| Inhibition of CTLA-4 and/or PD-1 for Regulations of T Cells                                          | US20210179714A1 | Memorial Sloan Kettering Cancer Center |
| Heat-inactivated vaccinia virus as a vaccine immune adjuvant                                         | EP3706768A1     | Memorial Sloan Kettering Cancer Center |
| CD40 binding molecules and uses of thereof                                                           | CA3202384A1     | Memorial Sloan Kettering Cancer Center |
| Antigen-binding proteins targeting melanoma differentiation antigens and uses thereof                | US20190375855A1 | Memorial Sloan Kettering Cancer Center |

|                                                                                   |                 |                                                                            |
|-----------------------------------------------------------------------------------|-----------------|----------------------------------------------------------------------------|
| CD40 binding molecules and uses thereof                                           | AU2021400733A9  | Memorial Sloan Kettering Cancer Center                                     |
| Anti-PD-1 antibodies and methods of use thereof                                   | AU2021200281B2  | Agenus Inc.                                                                |
| Anti-CTLA-4 antibodies and methods of use thereof                                 | NZ794974A       | Agenus Inc.                                                                |
| Peripheral blood phenotype linked to outcomes after immunotherapy treatment       | US20240085417A1 | Memorial Sloan Kettering Cancer Center                                     |
| CD4+ TFH- like cells as a therapeutic target                                      | US20230390390A1 | Memorial Sloan Kettering Cancer Center                                     |
| Antigen recognizing receptors targeting b7-h3 and uses there of                   | WO20224102685A2 | Memorial Sloan Kettering Cancer Center                                     |
| Anti-PD-1 Antibodies and their methods of use                                     | AR105886A1      | Agenus Inc.                                                                |
| Treatment of glycolysis-low and glycolysis-high tumors with CTLA-4 Inhibitors     | WO2023154959A2  | Memorial Sloan Kettering Cancer Center<br>Office of Technology Development |
| II33 Proteints and methods of use thereof                                         | WO2023081802A2  | Memorial Sloan Kettering Cancer Center                                     |
| Models for predicting mutant p53 fitness and their implications in cancer therapy | WO2022177989A1  | Memorial Sloan Kettering Cancer Center                                     |
| Chimeric receptor targeting muc16 and uses thereof                                | US20240189426A1 | Memorial Sloan Kettering Cancer Center                                     |
| Heteroclitc cancer vaccines                                                       | EP4121081A1     | Memorial Sloan Kettering Cancer Center                                     |

|                                                                                |                  |                                        |
|--------------------------------------------------------------------------------|------------------|----------------------------------------|
| Use of Composition, MVA?E3L and Pharmaceutically acceptable Vehicle of Diluent | BR112017022134B1 | Memorial Sloan Kettering Cancer Center |
| Antibodies and Methods of its use                                              | AR110348A1       | Agenus Inc.                            |
| Phosphatidylserine targeting agents and uses thereof for adoptive t-cell       | WO2019178207A1   | Memorial Sloan Kettering Cancer Center |
| Recombinant poxviruses for cancer immunotherapy                                | WO2024097448A1   | Memorial Sloan Kettering Cancer Center |
| Anti-CTLA-4 Antibodies and Methods of use of the same                          | AR104810A1       | Agenus Inc.                            |
| Uso de composicao MVA?E3L e veiculo ou Diluente Farmaceuticamente aceitavel    | BR112017022134B1 | Memorial Sloan Kettering Cancer Center |
|                                                                                |                  |                                        |

## Supplemental Figures

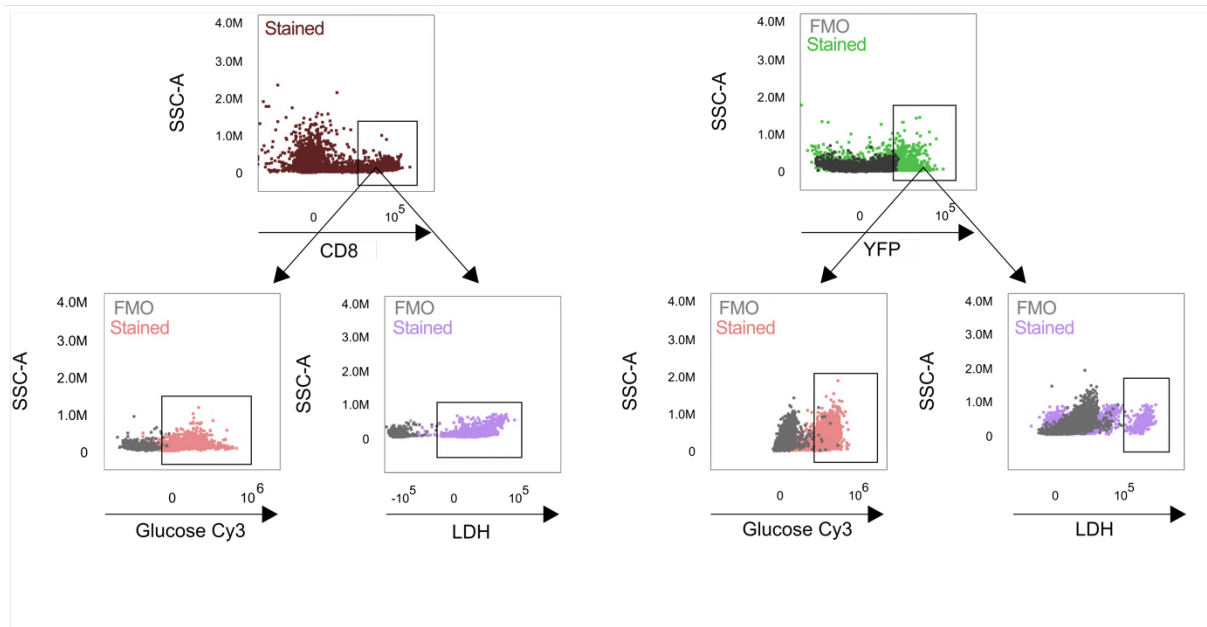

**Supplemental Figure 1. Gating strategy for Glucose Cy3 and LDH in YFP<sup>+</sup> B16 tumor cells and CD8<sup>+</sup> T cells.** Flow cytometry dot plots for Glucose-Cy3 and intracellular LDH staining compared to unstained or isotype controls (FMO, gray) for tumor-infiltrating CD8<sup>+</sup> T cells and YFP<sup>+</sup> B16 tumor cells from established B16-YFP murine tumors (corresponding to Main Figure 1F).

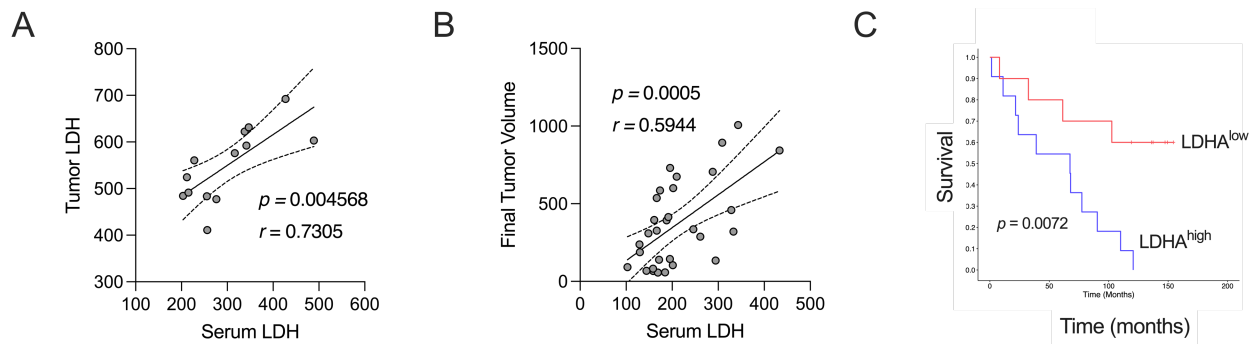

**Supplemental Figure 2. LDH correlates with poor prognosis.** (A-B) Correlations between B16 melanoma tumor LDH activity and serum LDH activity and between final B16 tumor burden and serum LDH activity quantified ex vivo from matched C57BL/6 mice 10 (A) and 20 (B) days of after tumor implantation, respectively. Data shown is representative of 3 independent experiments. Statistics produced by Spearman correlation tests in GraphPad. (C) Overall survival of melanoma patients stratified by tumor LDHA RNA expression. Samples were defined as LDHA<sup>high</sup> or LDHA<sup>low</sup> by expression of LDHA above or below the median LDHA value across all samples respectively (Source: Riaz et al. (57)). Statistics produced by unpaired T test with Welch's correction implemented in R.

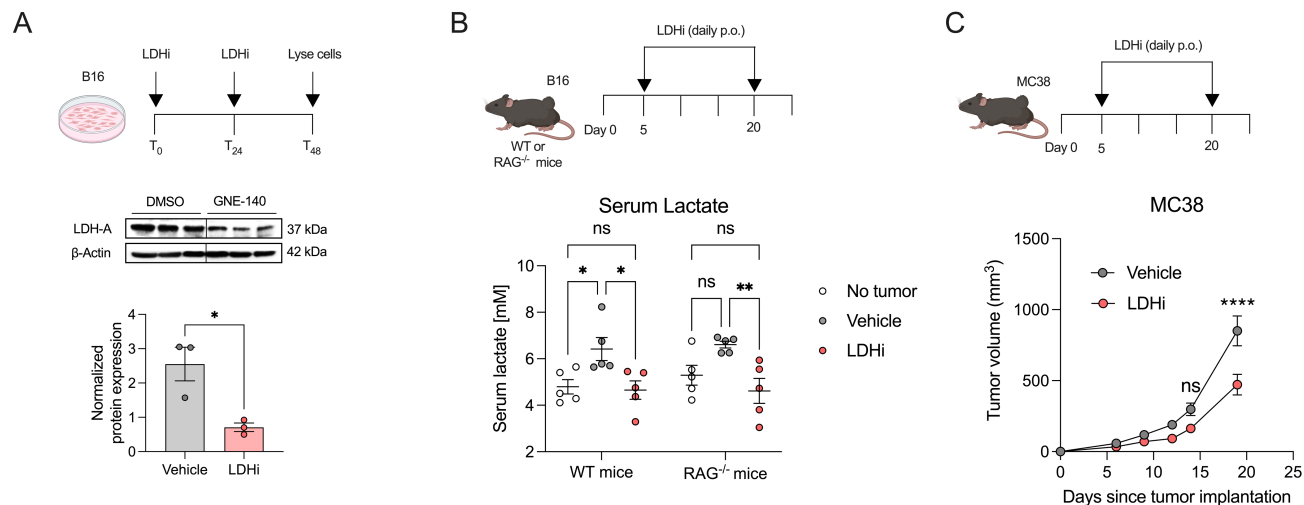

**Supplemental Figure 3. Effects of LDHi in mouse tumor models.** Corresponding to Main Figure 2. **(A)** Representative and densitometry quantification of western blot of LDHA and b-actin in whole cell lysates from B16 cells treated for 48hrs with 10  $\mu$ M LDHi or vehicle control (DMSO). **(B)** Quantified serum lactate from the indicated B16-bearing mouse strains 1h after the last treatment with LDHi (100mg/kg) or control vehicle as indicated in the schema. **(C)** MC38 tumor growth curves upon treatment with LDHi (100 mg/kg) or control vehicle as indicated in the schema ( $n = 5$ /group). Data shown are one representative experiment of 3 independent experiments. All statistics produced by **(A)** Wilcoxon Rank Sum Test or **(B-C)** Two-way ANOVA with Bonferroni's multiple comparisons test implemented in GraphPad Prism in which \*,  $P < 0.05$ ; \*\*,  $P < 0.01$ ; \*\*\*,  $P < 0.001$ ; \*\*\*\*,  $P < 0.0001$ . Data are mean  $\pm$  SEM.



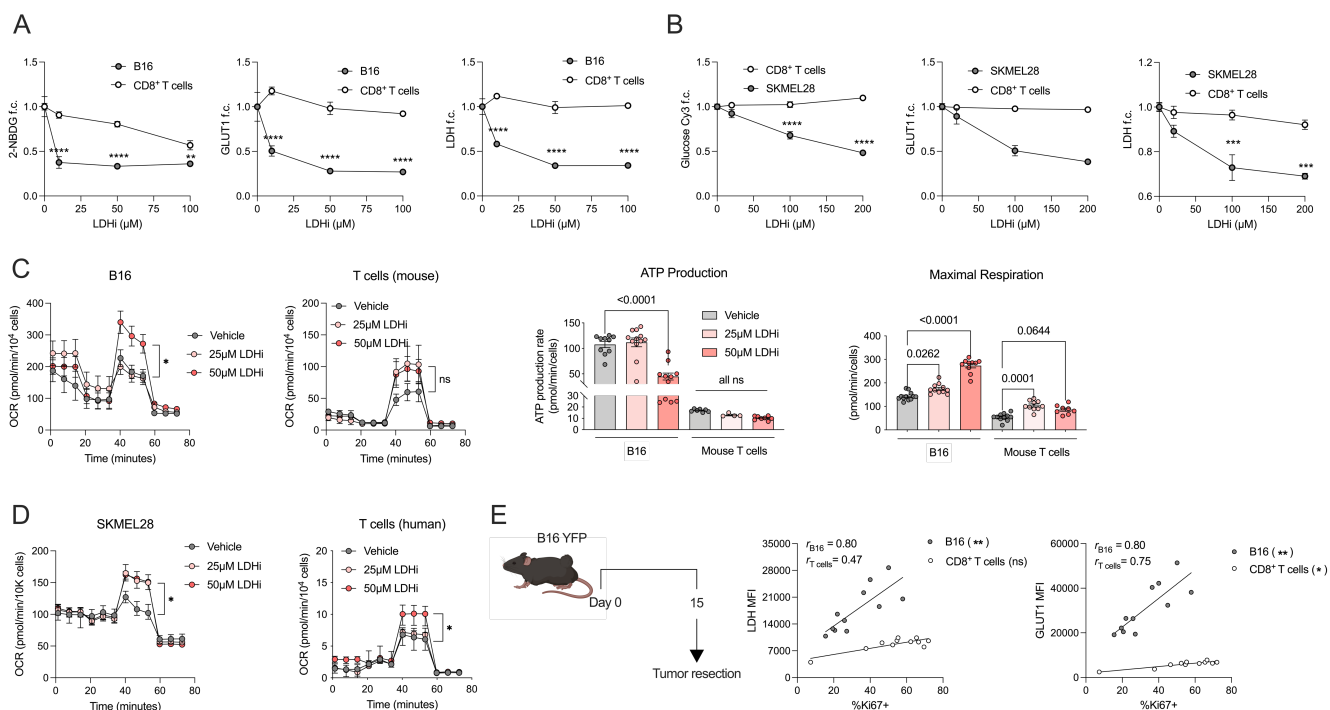

**Supplemental Figure 4. Tumor cells display more glycolytic sensitivity to LDH inhibition than immune cells. Corresponding to Main Figure 3. (A-B)** Fold-change values corresponding to data in Figure 3A-C, F-H. **(C)** Oxygen consumption rates (OCR), ATP production, and maximal respiration of B16 cells and activated mouse CD8<sup>+</sup> T cells treated with the indicated concentrations of LDHi or vehicle *in vitro*, normalized by cell number. Mouse T cells were treated with LDHi 24h post-aCD3/aCD28 activation and analyzed 24h later. **(D)** Oxygen consumption rates of SK-MEL-28 cells and activated human CD8<sup>+</sup> T cells treated with the indicated concentrations of LDHi or vehicle *in vitro*, normalized by cell number. Human T cells were treated with LDHi 48h post-aCD3/aCD28 activation and analyzed 24h later. **(E)** Correlations between LDH or GLUT1 expression (MFI) and %Ki67<sup>+</sup> cells (gated based on the isotype control staining) in CD8<sup>+</sup> T cells and B16 YFP<sup>+</sup> tumor cells quantified by flow cytometry from B16 tumors from untreated mice. Data shown are one representative experiment of 3 independent experiments. All statistics produced by **(A-B)** Wilcoxon Rank Sum Test, **(E)** Pearson Correlation, and **(C-D)** Two-way ANOVA with Bonferroni's multiple comparisons test implemented in GraphPad Prism in which \*,  $P < 0.05$ ; \*\*,  $P < 0.01$ ; \*\*\*,  $P < 0.001$ ; \*\*\*\*,  $P < 0.0001$ . Data are mean  $\pm$  SEM.

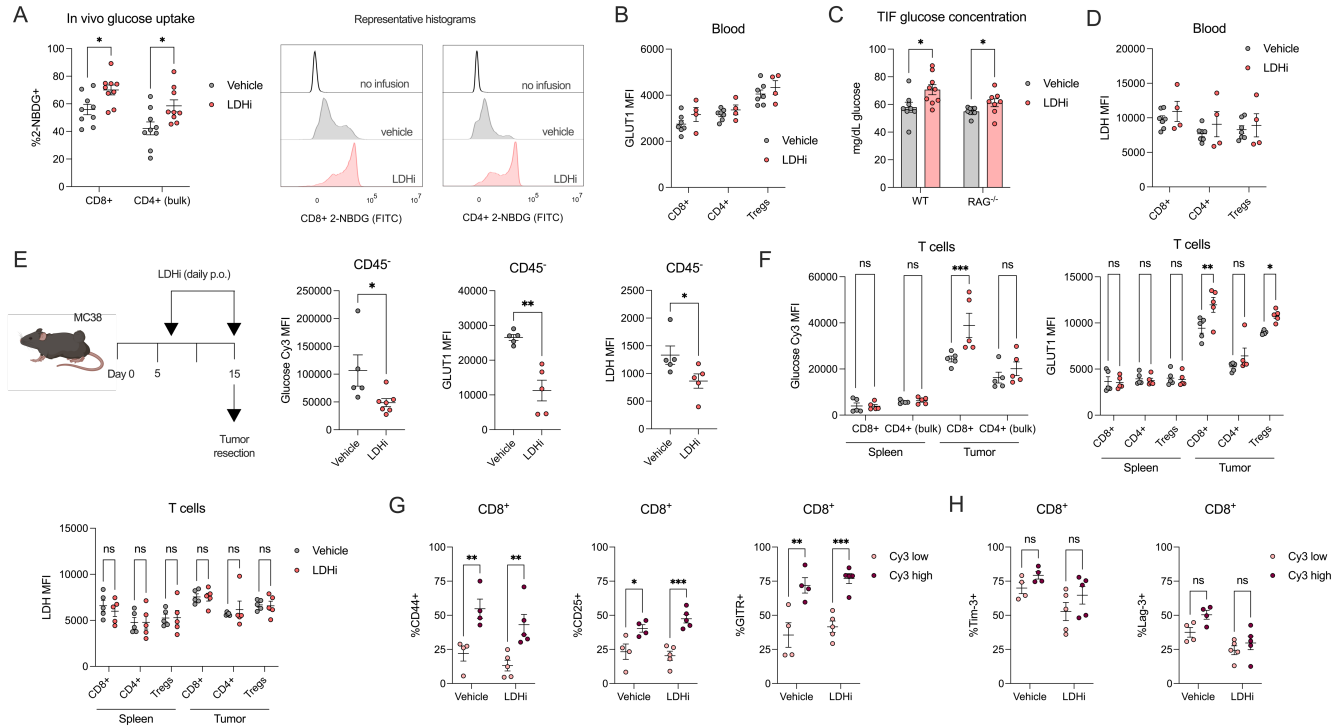

**Supplemental Figure 5. LDHi boosts glucose uptake of intratumoral T cells with no bioactivity in blood cells.** Corresponding to Main Figure 4. **(A-D)** Wild-type B16-bearing mice were treated with LDHi (100 mg/kg) or vehicle control for 10 days ( $n = 10/\text{group}$ ) and **(A)** % 2-NBDG<sup>+</sup> tumor-infiltrating T cells; and **(B)** GLUT1 and **(D)** LDH MFI in T cells from whole blood were quantified by flow cytometry; **(C)** and glucose concentrations in tumor interstitial fluid were quantified by glucose meter. **(E-F)** Quantification of Glucose Cy3, GLUT1, and LDH MFI by flow cytometry in **(E)** CD45<sup>-</sup> cells and **(F)** CD8<sup>+</sup>, CD4<sup>+</sup> Foxp3<sup>-</sup>, and CD4<sup>+</sup> Foxp3<sup>+</sup> T cell subsets isolated from tumors or spleens from MC38 bearing mice treated with LDHi (100 mg/kg) or vehicle control as indicated in the schema ( $n = 5$  biological replicates). **(G-H)** Quantified **(G)** markers of activation: %CD44<sup>+</sup>, %CD25<sup>+</sup>, %GTR<sup>+</sup>, and **(H)** markers of exhaustion: %Tim3<sup>+</sup>, and %Lag3<sup>+</sup>, on B16 tumor-infiltrating CD8<sup>+</sup> T cells stratified by high or low Glucose Cy3 uptake. Data shown are one representative experiment of 1-3 independent experiments. All statistics produced by Wilcoxon Rank Sum Test implemented in GraphPad Prism in which \*,  $P < 0.05$ ; \*\*,  $P < 0.01$ ; \*\*\*,  $P < 0.001$ ; \*\*\*\*,  $P < 0.0001$ . Data are mean  $\pm$  SEM.

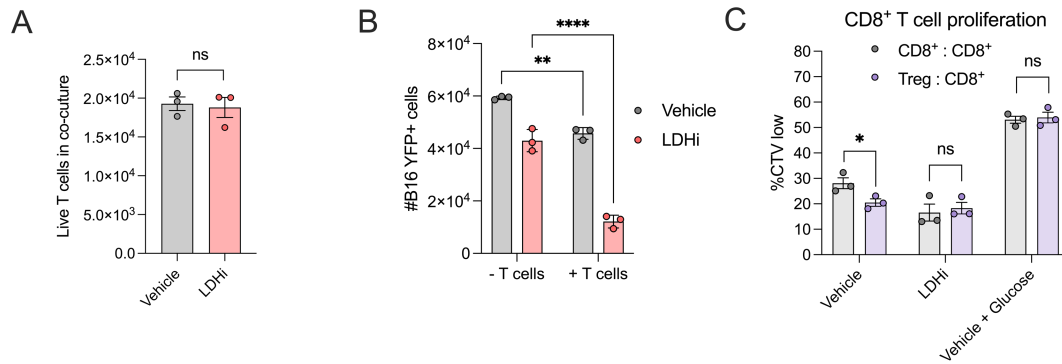

**Supplemental Figure 6. LDH inhibition improves anti-tumor T cell functions.** Corresponding to Main Figure 5. (A) Quantification of live CD8<sup>+</sup> T cells by flow cytometry after 48h killing assay co-culture, corresponding to experiment from Main Figure 5, C and D. (B) Raw data from Main Figure 5G: Quantification of live B16-YFP tumor cells from killing assay with OVA<sub>257-264</sub>-pulsed live B16-YFP tumor cells and OVA-primed CD8<sup>+</sup> T cells from OT1 transgenic mice upon 48-hr co-culture in the presence of LDHi (as indicated in the schema from Main Figure 5A). Effector to target ratio, E:T = 2:1, co-cultured over 48h. (C) Raw data from Main Figure 5I: Quantification of CD8<sup>+</sup> T cell proliferation by CTV from in vitro Treg suppression assay with MACS column-sorted Tregs (CD4<sup>+</sup> CD25<sup>+</sup> Regulatory T Cell Isolation Kit, mouse) co-cultured for 72hr with  $\alpha$ CD3/ $\alpha$ CD28 activated CTV-labeled syngeneic CD8<sup>+</sup> T cells and for 48hrs with the addition of conditioned media from B16 cells treated with 20  $\mu$ M LDHi or vehicle, or fresh media containing 10 mM glucose. Data are from one representative experiment of 2-4 independent experiments (n = 3-4 biological replicates). All statistics produced by (A) Wilcoxon Rank Sum Test, and (B-C) Two-way ANOVA with Bonferroni's multiple comparisons test implemented in GraphPad Prism in which \*,  $P < 0.05$ ; \*\*,  $P < 0.01$ ; \*\*\*,  $P < 0.001$ ; \*\*\*\*,  $P < 0.0001$ . Data are mean  $\pm$  SEM.

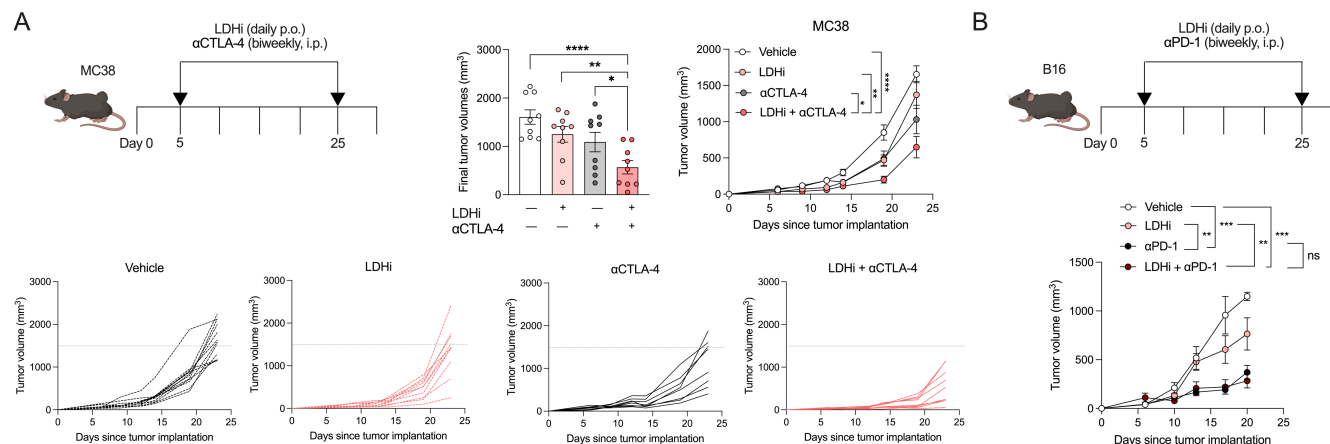

**Supplemental Figure 7. Anti-tumor activity of LDHi with ICB in vivo.** Corresponding to Main Figure 6. **(A)** Final tumor volumes and averaged and individual tumor growth curves (mm<sup>3</sup>) from MC38 tumor-bearing mice treated with 100 mg/kg LDHi and/or CTLA-4 blockade (9D9, IgG2b) or control vehicle/IgG as indicated in the schema ( $n = 8-10$  mice/group). **(B)** Tumor volumes (mm<sup>3</sup>) from B16 tumor-bearing mice treated with early (day 5) PD-1 blockade (RPM1-14, IgG2b) and/or 100 mg/kg LDHi or control vehicle/IgG as indicated in the schema ( $n = 10-15$  mice/group). Data are from one representative experiment of 2 independent experiments. All statistics produced by Wilcoxon Rank Sum Test or 2-way ANOVA implemented in GraphPad Prism in which \*,  $P < 0.05$ ; \*\*,  $P < 0.01$ ; \*\*\*,  $P < 0.001$ ; \*\*\*\*,  $P < 0.0001$ . Data are mean  $\pm$  SEM.

**Table S1. Flow cytometry antibody details.**

| <b>Antibodies</b>                            | <b>Vendor</b>  | <b>Cat No.</b> | <b>Clone</b>  |
|----------------------------------------------|----------------|----------------|---------------|
| Zombie NIR                                   | eBioscience    | 423105         | N/A           |
| BUV395 Rat Anti-Mouse CD45                   | BD Biosciences | 564279         | 30-F11        |
| BUV563 Rat Anti-Mouse CD62L                  | BD Biosciences | 741230         | MEL-14        |
| BUV615 Rat Anti-Mouse CD8a                   | BD Biosciences | 613004         | 53-6.7        |
| BUV737 Hamster Anti-Mouse CD11c              | BD Biosciences | 612796         | HL3           |
| BUV805 Hamster Anti-Mouse TCR $\beta$ Chain  | BD Biosciences | 748405         | H57-597       |
| Brilliant Violet 421 anti-T-bet              | BioLegend      | 644816         | 4B10          |
| Pacific Blue anti-mouse H-2Kb                | BioLegend      | 116514         | AF6-88.5      |
| Pacific Blue anti-mouse H-2Kd                | BioLegend      | 116616         | SF1-1.1       |
| BV480 Rat Anti-Mouse CD274 (PD-L1)           | BD Biosciences | 746275         | MIH5          |
| Brilliant Violet 510 anti-mouse/human CD11b  | BioLegend      | 101263         | M1/70         |
| Pacific Orange anti-mouse F4/80              | Invitrogen     | MF48030        | BM8           |
| Brilliant Violet 570 anti-mouse Ly-6C        | BioLegend      | 128029         | HK1.4         |
| Super Bright 645 anti-mouse CD19             | Invitrogen     | 64-0193-82     | eBio1D3 (1D3) |
| Super Bright 702 anti-mouse CD86 (B7-2)      | Invitrogen     | 67-0862-82     | GL1           |
| BV750 Rat Anti-Mouse CD357 (GITR)            | BD Biosciences | 747402         | DTA-1         |
| Brilliant Violet 785 anti-mouse CD279 (PD-1) | BioLegend      | 135225         | 29F.1A12      |
| Alexa Fluor 488 anti-mouse CD80              | BioLegend      | 104716         | 16-10A1       |
| Spark Blue 550 anti-mouse I-A/I-E            | BioLegend      | 107662         | M5/114.15.2   |
| PerCP anti-mouse Ly-6G                       | BioLegend      | 127654         | 1A8           |
| PerCP/Cyanine5.5 anti-mouse CD206 (MMR)      | BioLegend      | 141715         | C068C2        |
| PerCP-eFluor 710 anti-mouse FOXP3            | Invitrogen     | 46-5773-82     | FJK-16s       |
| PE/Dazzle 594 anti-mouse CD134 (OX-40)       | BioLegend      | 119418         | OX-86         |
| PE-Cyanine5 anti-mouse EOMES                 | Invitrogen     | 15-4875-82     | Dan11mag      |
| PE-Cyanine7 anti-mouse CD152 (CTLA-4)        | Invitrogen     | 25-1522-82     | UC10-4B9      |
| APC anti-mouse/human Granzyme B              | Invitrogen     | GRB05          | GB11          |
| Spark NIR 685 anti-mouse CD25                | BioLegend      | 102070         | PC61.5        |
| Alexa Fluor 700 anti-mouse CD44              | Invitrogen     | 56-0441-82     | IM7           |
| APC-eFluor 780 anti-mouse Ki-67              | Invitrogen     | 47-5698-82     | SolA15        |

|                                                     |                |          |         |
|-----------------------------------------------------|----------------|----------|---------|
| APC/Fire 810 anti-mouse CD4                         | BioLegend      | 100480   | GK1.5   |
| BUV661 Hamster Anti-Mouse<br>CD154 (CD40L)          | BD Biosciences | 741499   | MR1     |
| BUV496 Anti-Mouse H-2Ld/H-<br>2Db                   | BD Biosciences | 749923   | 28-14-8 |
| Alexa Fluor 647 anti-glucose<br>transporter (GLUT1) | Abcam          | Ab195020 | EPR3915 |
| PE anti-lactate dehydrogenase<br>(LDH)              | Abcam          | Ab210445 | EP1563Y |
